# Supplementary material
Source: publisher figshare collection journal article supplement (https://frontiersin.figshare.com/ndownloader/files/25613834)
Supplement: Supplementary file 1 [file 25613834]

**Appendix**

Words and pseudowords used in the spelling of the schwa task

| **C/ɨ/.CVC** | | | | **CV.C/ɨ/** | | | |
| --- | --- | --- | --- | --- | --- | --- | --- |
| Potential Illegal onset (CCVC) | | Potential Legal onset (CCVC) | | Potential Illegal coda (CVC) | | Potential Legal coda  (CVC) | |
| Word | PseudoW | Word | PseudoW | Word | PseudoW | Word | PseudoW |
| melão  /mɨlˈɐ̃w̃/ | zelão  /zɨlˈɐ̃w̃/ | ferir  /fɨɾˈiɾ/ | querir  /kɨɾˈiɾ/ | nave  /nˈavɨ/ | mave  /mˈavɨ/ | xale  /ʃˈalɨ/ | nale  /nˈalɨ/ |
| veloz  /vɨlˈɔʃ/ | meloz  /mɨlˈɔʃ/ | verão  /vɨɾˈɐ̃w̃/ | derão  /dɨɾˈɐ̃w̃/ | bibe  /bˈibɨ/ | dibe  /bˈibɨ/ | tule  /tˈulɨ/ | dule  /dˈulɨ/ |
|  |  |  |  |  |  |  |  |
| tenaz  /tɨnˈaʃ/ | benaz  /bɨnˈaʃ/ | feliz  /fɨlˈiʃ/ | peliz  /pɨlˈiʃ/ | doce  /dˈosɨ/ | boce  /dˈosɨ/ | pele  /pˈɛlɨ/ | tele  /tˈɛlɨ/ |
|  |  |  |  |  |  |  |  |
| redor  /Rɨd’ɔɾ/ | vedor  /Rɨd’ɔr/ | feroz  /fɨɾˈɔʃ/ | beroz  /bɨɾˈɔʃ/ | jade  /ʒˈadɨ/ | lade  /ʒˈadɨ/ | mole  /mˈɔlɨ/ | xole  /ʃˈɔlɨ/ |
|  |  |  |  |  |  |  |  |
| pedal  /pɨd’al/ | depal  /dɨp’al/ | pelar  /pɨlˈaɾ/ | telar  /tɨlˈaɾ/ | bote  /bˈɔtɨ/ | jote  /ʒˈɔtɨ/ | fole  /fˈɔlɨ/ | pole  /pˈɔlɨ/ |
|  |  |  |  |  |  |  |  |

Monosyllabic words and pseudowords

| **Coda /r/** | | **Coda /l/** | | **Coda /S/** | |
| --- | --- | --- | --- | --- | --- |
| Word | PseudoW | Word | PseudoW | Word | PseudoW |
| lar  /laɾ/ | sar  /laɾ/ | mal  /mal/ | bal  /mal/ | foz  /fɔʃ/ | roz  /Rɔʃ/ |
|  |  |  |  |  |  |
| dor  /doɾ/ | bôr  /doɾ/ | til  /til/ | dil  /dil/ | luz  /luʃ/ | muz  /muʃ/ |
|  |  |  |  |  |  |
| vir  /viɾ/ | lir  /viɾ/ | fel  /fˈɛl/ | sel  /sˈɛl/ | gás  /ɡaʃ/ | bás  /baʃ/ |
|  |  |  |  |  |  |
| quer  /kɛɾ/ | fer  /kɛɾ/ | sol  /sɔl/ | jol  /ʒɔl/ | lis  /liʃ/ | tis  /tiʃ/ |
|  |  |  |  |  |  |
| cor  /koɾ/ | nór  /koɾ/ | sul  /sul/ | vul  /vul/ | pez  /pˈeʃ/ | nés  /nˈeʃ/ |
|  |  |  |  |  |  |
| CV.CV orthographically consistent with two fully articulated vowels | | | | | |
| Words |  |  |  |  |  |
|  | tela | boda | fama | nora | viga |
|  | /tˈɛlɐ/ | /bˈodɐ/ | /fˈɐmɐ/ | /nˈɔɾɐ/ | /vˈiɡɐ/ |
| Pseudowords |  |  |  |  |  |
|  | leta | doba | sama | vora | niga |
|  | /lˈɛtɐ/ | /dˈobɐ/ | /sˈɐmɐ/ | /vˈɔɾɐ/ | /nˈiɡɐ/ |
